# Supplementary material
Source: Springer Nature journal article supplement (https://www.springermedizin.de/resource/supplementary/12913_2013_2982_MOESM1_ESM.pdf/9532956)

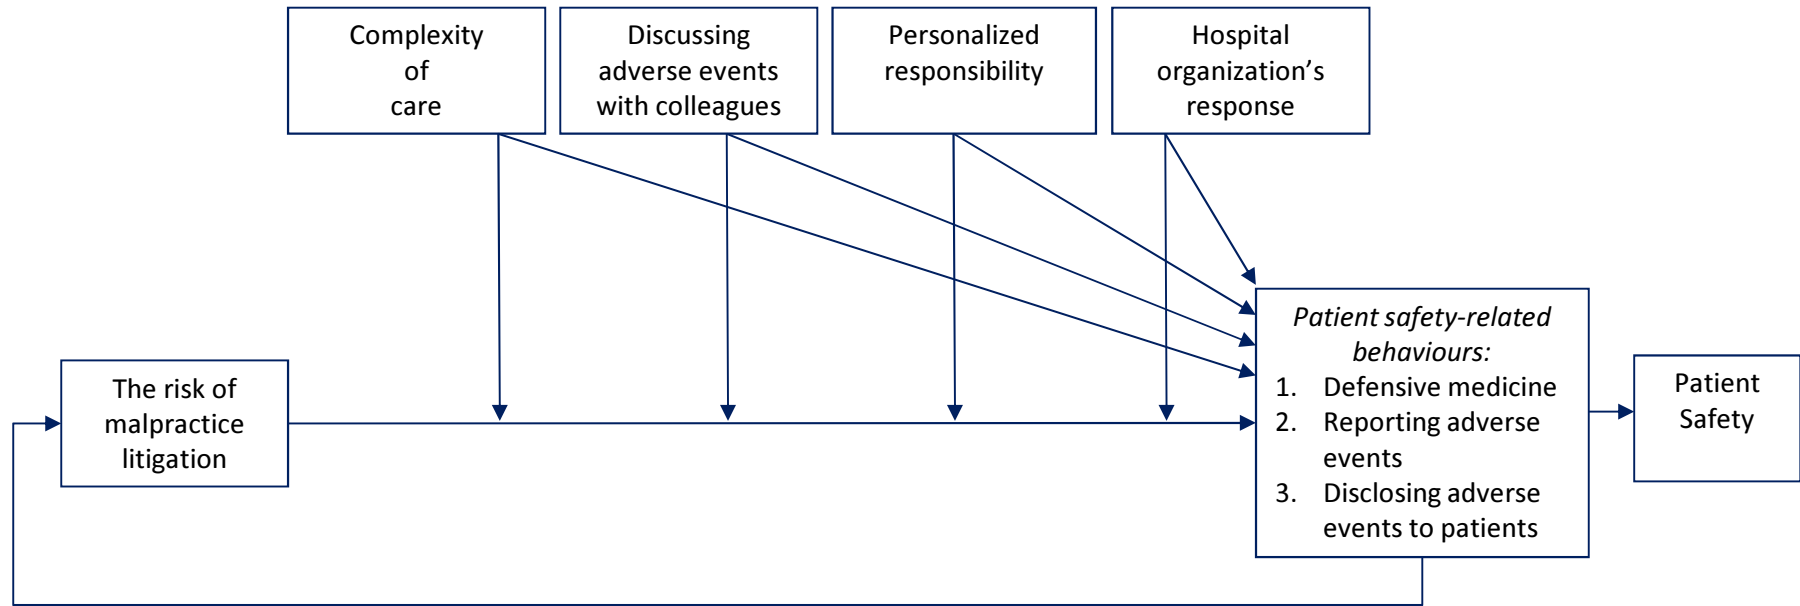

Supplement: MOESM1 [file 9532956]
